# Supplementary material for: Health‐Related Quality of Life in MONARCH 2: Abemaciclib plus Fulvestrant in Hormone Receptor‐Positive, HER2‐Negative Advanced Breast Cancer After Endocrine Therapy
Source: PubMed Central journal article supplement — Oncologist. 2019 Oct 24;25(2):e243–51. doi: 10.1634/theoncologist.2019-0551 (PMC7011625; doi:10.1634/theoncologist.2019-0551), 2019-10-24
Supplement: ONCO-25-e243-s001.pdf [file ONCO-25-e243-s001.pdf]

Supplemental Tables for:  
 Health-Related Quality of Life in MONARCH 2: Abemaciclib plus Fulvestrant in HR+, HER2- Advanced Breast Cancer after Endocrine Therapy  
 Gregory L. Price et al.

**Supplemental Table S1.** Patient compliance (%) for the mBPI-sf, EORTC QLQ-C30 and EORTC QLQ-BR23 by study arm and visit.

| Planned visit   | Main reason<br>if not<br>compliant    | Abemaciclib            | Placebo +            | Abemaciclib            | Placebo +            | Abemaciclib            | Placebo +            |
|-----------------|---------------------------------------|------------------------|----------------------|------------------------|----------------------|------------------------|----------------------|
|                 |                                       | + fulvestrant<br>n=441 | fulvestrant<br>n=223 | + fulvestrant<br>n=441 | fulvestrant<br>n=223 | + fulvestrant<br>n=441 | fulvestrant<br>n=223 |
|                 |                                       | mBPI-sf                |                      | EORTC QLQ-C30          |                      | EORTC QLQ-BR23         |                      |
| <b>Baseline</b> |                                       | 95.5                   | 97.8                 | 97.7                   | 98.2                 | 97.7                   | 98.7                 |
|                 | Missing                               | 1.1                    | 0.4                  | 0.5                    | 0.0                  | 0.5                    | 0.0                  |
|                 | Other                                 | 1.6                    | 0.4                  | 0.2                    | 0.9                  | 0.2                    | 0.4                  |
|                 | Study site<br>failed to<br>administer | 1.6                    | 1.3                  | 1.1                    | 0.9                  | 1.1                    | 0.9                  |
|                 | Subject<br>refusal                    | 0.2                    | 0.0                  | 0.5                    | 0.0                  | 0.5                    | 0.0                  |
| <b>Cycle 2</b>  |                                       | 94.6                   | 92.6                 | 96.4                   | 94.4                 | 95.4                   | 94.0                 |
|                 | Missing                               | 0.5                    | 0.9                  | 0.2                    | 0.5                  | 0.2                    | 0.0                  |

|                |                                       |      |      |      |      |      |      |
|----------------|---------------------------------------|------|------|------|------|------|------|
|                | Other                                 | 1.9  | 1.9  | 1.0  | 0.5  | 1.2  | 0.9  |
|                | Study site<br>failed to<br>administer | 2.4  | 3.2  | 1.9  | 3.7  | 2.7  | 3.7  |
|                | Subject<br>refusal                    | 0.5  | 1.4  | 0.5  | 0.9  | 0.5  | 1.4  |
| <b>Cycle 3</b> |                                       | 95.3 | 93.9 | 96.9 | 96.9 | 96.1 | 95.9 |
|                | Missing                               | 0.3  | 0.5  | 0.3  | 0.5  | 0.3  | 0.5  |
|                | Other                                 | 1.8  | 1.5  | 0.8  | 0.0  | 1.3  | 0.5  |
|                | Study site<br>failed to<br>administer | 1.6  | 3.1  | 1.3  | 2.0  | 1.6  | 2.6  |
|                | Subject<br>refusal                    | 1.0  | 0.5  | 0.8  | 0.5  | 0.8  | 0.5  |
| <b>Cycle 5</b> |                                       | 95.8 | 95.0 | 96.7 | 96.9 | 96.4 | 98.1 |
|                | Missing                               | 0.0  | 0.0  | 0.0  | 0.0  | 0.0  | 0.0  |
|                | Other                                 | 2.1  | 1.3  | 1.5  | 0.6  | 1.5  | 0.0  |
|                | Study site                            | 1.2  | 1.9  | 0.9  | 1.3  | 1.2  | 0.6  |

|                |                                 |      |      |      |      |      |      |
|----------------|---------------------------------|------|------|------|------|------|------|
|                | failed to administer            |      |      |      |      |      |      |
|                | Subject refusal                 | 0.9  | 1.9  | 0.9  | 1.3  | 0.9  | 1.3  |
| <b>Cycle 7</b> |                                 | 93.5 | 97.0 | 94.5 | 97.8 | 94.1 | 97.0 |
|                | Missing                         | 0.0  | 0.0  | 0.0  | 0.0  | 0.3  | 0.0  |
|                | Other                           | 2.3  | 1.5  | 2.0  | 0.7  | 2.0  | 0.7  |
|                | Study site failed to administer | 2.0  | 0.0  | 1.6  | 0.0  | 1.6  | 0.7  |
|                | Subject refusal                 | 2.3  | 1.5  | 2.0  | 1.5  | 2.0  | 1.5  |
| <b>Cycle 9</b> |                                 | 95.0 | 95.6 | 95.0 | 97.4 | 95.7 | 96.5 |
|                | Missing                         | 0.0  | 0.0  | 0.0  | 0.0  | 0.0  | 0.0  |
|                | Other                           | 1.1  | 0.9  | 1.4  | 0.0  | 1.1  | 0.9  |
|                | Study site failed to administer | 2.1  | 2.6  | 2.1  | 2.6  | 1.8  | 2.6  |

|                 |                                 |      |      |      |      |      |      |
|-----------------|---------------------------------|------|------|------|------|------|------|
|                 | Subject refusal                 | 1.8  | 0.9  | 1.4  | 0.0  | 1.4  | 0.0  |
| <b>Cycle 11</b> |                                 | 95.8 | 97.0 | 95.8 | 97.0 | 95.4 | 97.0 |
|                 | Missing                         | 0.4  | 0.0  | 0.4  | 0.0  | 0.4  | 0.0  |
|                 | Other                           | 0.4  | 1.0  | 0.4  | 1.0  | 0.4  | 1.0  |
|                 | Study site failed to administer | 2.7  | 0.0  | 2.7  | 0.0  | 3.1  | 0.0  |
|                 | Subject refusal                 | 0.8  | 2.0  | 0.8  | 2.0  | 0.8  | 2.0  |
| <b>Cycle 13</b> |                                 | 96.3 | 97.8 | 97.1 | 97.8 | 96.7 | 97.8 |
|                 | Missing                         | 0.0  | 0.0  | 0.0  | 0.0  | 0.0  | 0.0  |
|                 | Other                           | 0.8  | 0.0  | 0.4  | 0.0  | 0.4  | 0.0  |
|                 | Study site failed to administer | 2.5  | 2.2  | 2.1  | 2.2  | 2.1  | 2.2  |
|                 | Subject refusal                 | 0.4  | 0.0  | 0.4  | 0.0  | 0.8  | 0.0  |

|                 |                                       |      |       |      |       |      |       |
|-----------------|---------------------------------------|------|-------|------|-------|------|-------|
| <b>Cycle 16</b> |                                       | 91.4 | 94.6  | 92.4 | 94.6  | 91.9 | 94.6  |
|                 | Missing                               | 1.0  | 4.1   | 1.0  | 4.1   | 1.0  | 4.1   |
|                 | Other                                 | 2.4  | 0.0   | 2.4  | 0.0   | 2.4  | 0.0   |
|                 | Study site<br>failed to<br>administer | 3.8  | 1.4   | 3.3  | 1.4   | 3.8  | 1.4   |
|                 | Subject<br>refusal                    | 1.4  | 0.0   | 1.0  | 0.0   | 1.0  | 0.0   |
| <b>Cycle 19</b> |                                       | 94.6 | 100.0 | 95.3 | 100.0 | 95.3 | 100.0 |
|                 | Missing                               | 1.4  | 0.0   | 1.4  | 0.0   | 1.4  | 0.0   |
|                 | Other                                 | 1.4  | 0.0   | 0.7  | 0.0   | 0.7  | 0.0   |
|                 | Study site<br>failed to<br>administer | 2.7  | 0.0   | 2.7  | 0.0   | 2.7  | 0.0   |
|                 | Subject<br>refusal                    | 0.0  | 0.0   | 0.0  | 0.0   | 0.0  | 0.0   |
| <b>Cycle 22</b> |                                       | 96.7 | 85.7  | 96.7 | 85.7  | 97.8 | 85.7  |
|                 | Missing                               | 0.0  | 3.6   | 0.0  | 3.6   | 0.0  | 3.6   |

|                 |                                       |      |       |      |       |      |       |
|-----------------|---------------------------------------|------|-------|------|-------|------|-------|
|                 | Other                                 | 0.0  | 0.0   | 0.0  | 0.0   | 0.0  | 0.0   |
|                 | Study site<br>failed to<br>administer | 2.2  | 10.7  | 3.3  | 10.7  | 2.2  | 10.7  |
|                 | Subject<br>refusal                    | 1.1  | 0.0   | 0.0  | 0.0   | 0.0  | 0.0   |
| <b>Cycle 25</b> |                                       | 98.1 | 100.0 | 98.1 | 100.0 | 98.1 | 100.0 |
|                 | Missing                               | 1.9  | 0.0   | 1.9  | 0.0   | 1.9  | 0.0   |
|                 | Other                                 | 0.0  | 0.0   | 0.0  | 0.0   | 0.0  | 0.0   |
|                 | Study site<br>failed to<br>administer | 0.0  | 0.0   | 0.0  | 0.0   | 0.0  | 0.0   |
|                 | Subject<br>refusal                    | 0.0  | 0.0   | 0.0  | 0.0   | 0.0  | 0.0   |
| <b>Cycle 28</b> |                                       | 96.0 | 100.0 | 96.0 | 100.0 | 96.0 | 100.0 |
|                 | Missing                               | 0.0  | 0.0   | 0.0  | 0.0   | 0.0  | 0.0   |
|                 | Other                                 | 0.0  | 0.0   | 0.0  | 0.0   | 0.0  | 0.0   |
|                 | Study site                            | 4.0  | 0.0   | 4.0  | 0.0   | 4.0  | 0.0   |

|                                       |                                 |      |      |      |      |      |      |
|---------------------------------------|---------------------------------|------|------|------|------|------|------|
|                                       | failed to administer            |      |      |      |      |      |      |
|                                       | Subject refusal                 | 0.0  | 0.0  | 0.0  | 0.0  | 0.0  | 0.0  |
| <b>Post-discontinuation Follow-up</b> |                                 | 77.9 | 78.5 | 77.1 | 82.3 | 78.4 | 82.3 |
|                                       | Missing                         | 0.0  | 0.0  | 0.0  | 0.0  | 0.0  | 0.0  |
|                                       | Other                           | 8.5  | 8.9  | 8.1  | 7.6  | 8.5  | 7.6  |
|                                       | Study site failed to administer | 5.5  | 7.0  | 6.8  | 4.4  | 5.1  | 5.1  |
|                                       | Subject refusal                 | 7.7  | 5.7  | 7.6  | 5.7  | 7.6  | 5.1  |

Abbreviations: EORTC QLQ-BR23, European Organization for Research and Treatment of Cancer Breast Cancer-Specific Quality-of-Life Questionnaire; EORTC QLQ-C30, European Organization for the Research and Treatment of Cancer, Quality-of-Life Questionnaire Core 30; mBPI-sf, Modified Brief Pain Inventory–short form; n, number of patients.
