# Supplementary material for: Health‐Related Quality of Life in MONARCH 2: Abemaciclib plus Fulvestrant in Hormone Receptor‐Positive, HER2‐Negative Advanced Breast Cancer After Endocrine Therapy
Source: PubMed Central journal article supplement — Oncologist. 2019 Oct 24;25(2):e243–51. doi: 10.1634/theoncologist.2019-0551 (PMC7011625; doi:10.1634/theoncologist.2019-0551), 2019-10-24

Supplemental Figures for:  
Health-Related Quality of Life in MONARCH 2: Abemaciclib plus Fulvestrant in HR+, HER2- Advanced Breast Cancer after Endocrine Therapy  
Gregory L. Price et al.

**Supplemental Figure S1.** Forest plot of mean differences, obtained with longitudinal mixed regression models, between study arms in change from baseline scores for the EORTC QLQ-C30. Abbreviations: EORTC QLQ-C30, European Organization for Research and Treatment of Cancer QoL Core 30.

Kaufman, Supplemental Figure 1, Top

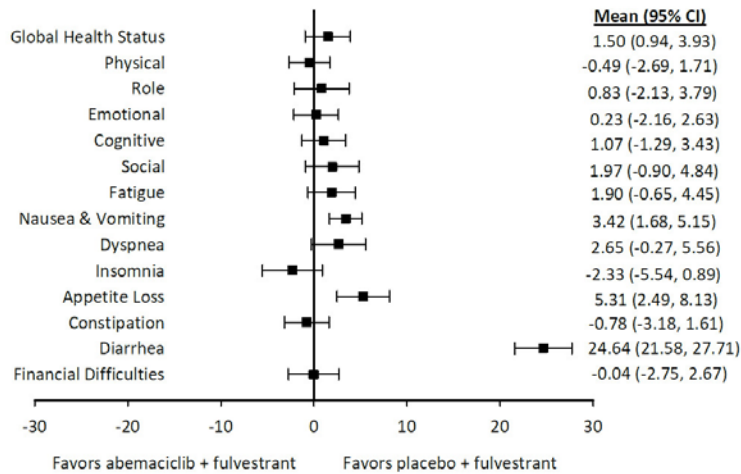

**Supplemental Figure S2.** Forest plot of mean differences, obtained with longitudinal mixed regression models, between study arms in change from baseline scores for the EORTC BR-23. Abbreviations: EORTC BR-23, Breast Cancer Questionnaire.

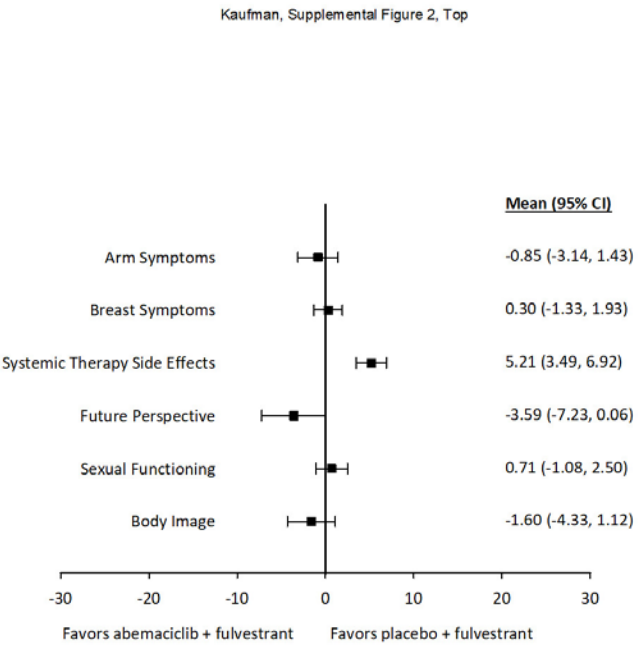

Supplement: ONCO-25-e243-s002.pdf [file ONCO-25-e243-s002.pdf]
